# Supplementary material for: Decreased Annexin A1 expression enhances sensitivity to docetaxel, cisplatin and 5‐fluorouracil combination induction chemotherapy in oral squamous cell carcinoma
Source: PubMed Central journal article supplement — J Oral Pathol Med. 2021 Jul 5;50(8):795–802. doi: 10.1111/jop.13221 (PMC8518620; doi:10.1111/jop.13221), 2021-07-05
Supplement: JOP-50-795-s001.pdf [file JOP-50-795-s001.pdf]

Supplementary Table 1

|        |         |                                                                       |
|--------|---------|-----------------------------------------------------------------------|
| shRNA1 | Forward | gatccGCATAAGGCCATAATGGTTTTCAAGAGAAAC<br>CATTATGGCCTTATGCTTTTTTACGCGTg |
|        | Reverse | aattcACGCGTAAAAAAGCATAAGGCCATAATGGTT<br>TCTCTTGAAAACCATTATGGCCTTATGCg |
| shRNA1 | Forward | aattcACGCGTAAAAAAGCTTCATCAAGCCATGAAA<br>TCTCTTGAATTCATGGCTTGATGAAGCg  |
|        | Reverse | aattcACGCGTAAAAAAGCTTCATCAAGCCATGAAA<br>TCTCTTGAATTCATGGCTTGATGAAGCg  |

Two sets of short hairpin RNA oligonucleotide were designed to interfere Annexin A1 expression.

Supplementary Table 2

|                          |         |                                 |
|--------------------------|---------|---------------------------------|
| AnnexinA1<br>88 bp       | Forward | 5'-AGTTCTGGACCTGGAGTTGAAAG-3'   |
|                          | Reverse | 5'-TGCAAAGAAAGCTGGTTTGC-3'      |
| $\beta$ -actin<br>100 bp | Forward | 5'-TGGATCAGCAAGCAGGAGTAT-3'     |
|                          | Reverse | 5'-GGTTTTGTCAAGAAAGGGTGTAACG-3' |

Annexin A1 gene and  $\beta$ -actin primers for Real-time PCR.

Supplementary Table 3

|                                            |                            |
|--------------------------------------------|----------------------------|
| rabbit anti-Annexin A1 polyclonal antibody | Abcam, catalog no. ab33061 |
| rabbit anti-cleaved fragment of human PARP | CST, Asp214, Code NO.5625P |
| cleaved fragment of caspase 3              | CST, Asp175, Code NO.9664P |
| AKT                                        | CST, Code NO.9272          |
| pAKT                                       | CST, Ser473, Code NO.4060P |
| p27                                        | CST, Code NO.3698          |
| pEGFR                                      | Abcam, catalog no. ab40815 |
| PDK1                                       | CST, Code NO.9652          |
| pPDK1                                      | CST, Code NO.9652          |
| $\beta$ -actin                             | MBL, Code NO.PM053         |

Primary antibodies were used in this study.
