# Supplementary figures and images for: Decreased Annexin A1 expression enhances sensitivity to docetaxel, cisplatin and 5‐fluorouracil combination induction chemotherapy in oral squamous cell carcinoma
Source: PubMed Central journal article supplement — J Oral Pathol Med. 2021 Jul 5;50(8):795–802. doi: 10.1111/jop.13221 (PMC8518620; doi:10.1111/jop.13221), 2021-07-05

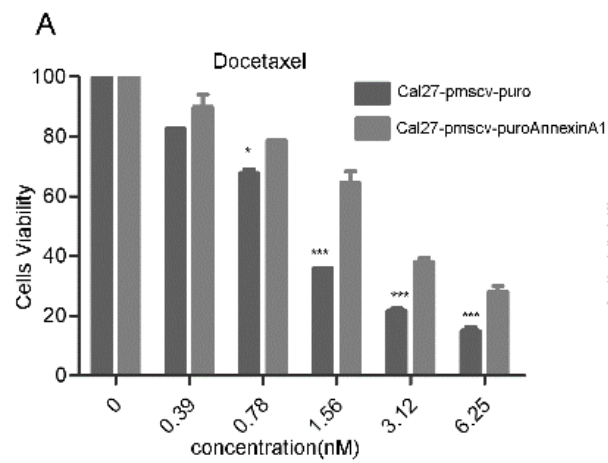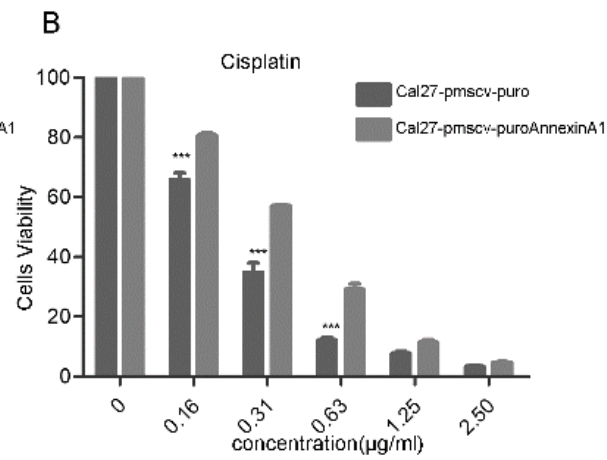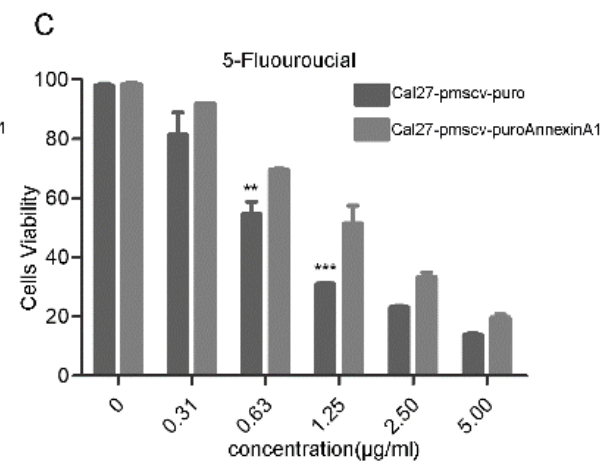

Supplement: JOP-50-795-s002.pdf [file JOP-50-795-s002.pdf]

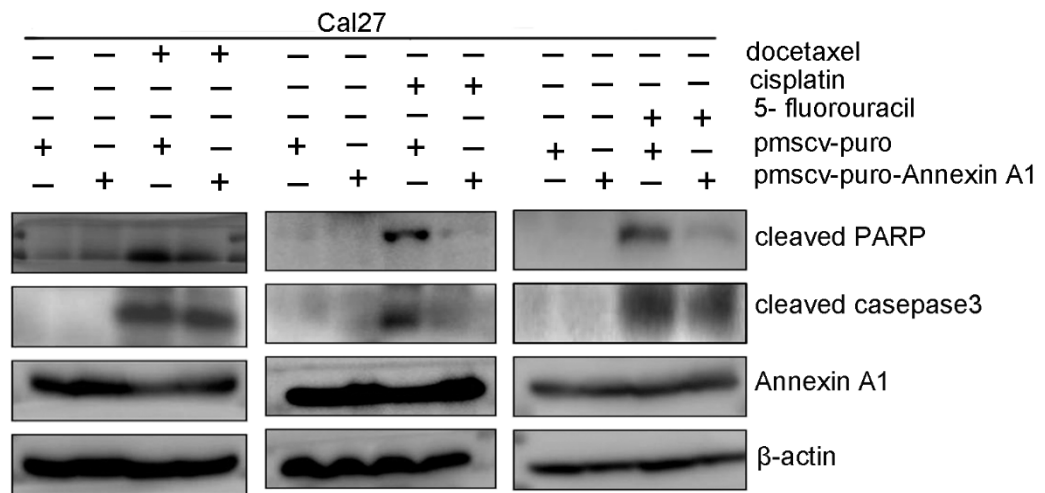

Supplement: JOP-50-795-s004.pdf [file JOP-50-795-s004.pdf]

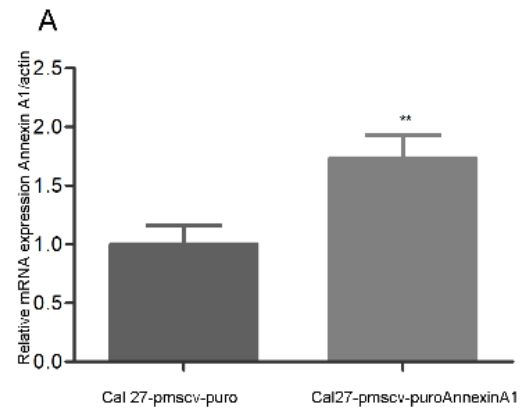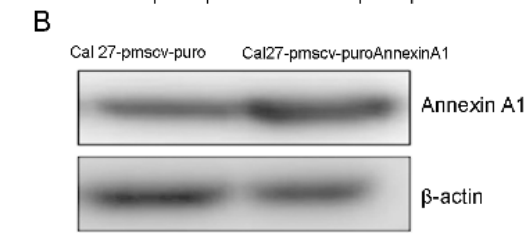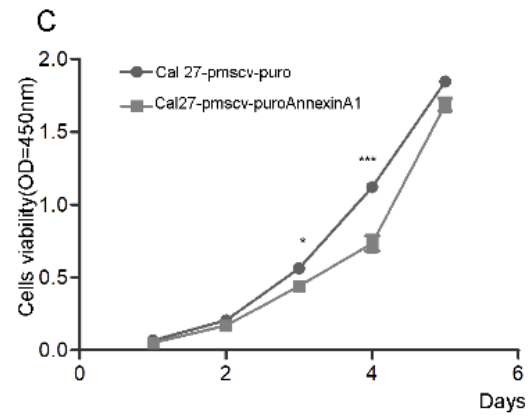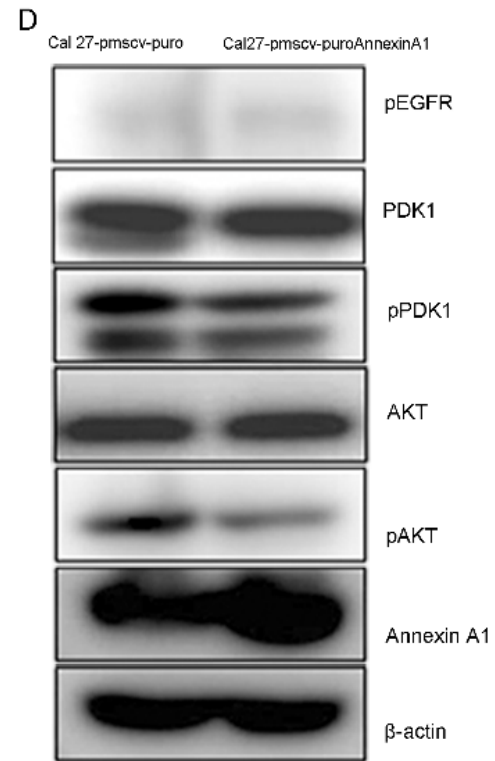

Supplement: JOP-50-795-s005.pdf [file JOP-50-795-s005.pdf]
